# Supplementary material
Source: publisher figshare collection journal article supplement (https://acs.figshare.com/ndownloader/files/5339347)
Supplement: Supplementary file 1 [file 5339347]

_publ_contact_author_name        'Roman Dembinski'
;
       address

_publ_contact_author_email       dembinsk@oakland.edu
_publ_contact_author_phone       +001(248)3702248
data_dembznap

data_for_complex_6b

_audit_creation_method            SHELXL-97
_chemical_name_systematic
;
 ?
;
_chemical_name_common             ?
_chemical_melting_point           ?
_chemical_formula_moiety          ?
_chemical_formula_sum
 'C14 H18 N2 O5'
_chemical_formula_weight          294.30

loop_
 _atom_type_symbol
 _atom_type_description
 _atom_type_scat_dispersion_real
 _atom_type_scat_dispersion_imag
 _atom_type_scat_source
 'C'  'C'   0.0033   0.0000
 'International Tables Vol C Tables 4.2.6.8 and 6.1.1.4'
 'H'  'H'   0.0000   0.0000
 'International Tables Vol C Tables 4.2.6.8 and 6.1.1.4'
 'N'  'N'   0.0061   0.0000
 'International Tables Vol C Tables 4.2.6.8 and 6.1.1.4'
 'O'  'O'   0.0106   0.0000
 'International Tables Vol C Tables 4.2.6.8 and 6.1.1.4'

_symmetry_cell_setting            'orthorhombic'
_symmetry_space_group_name_H-M    'P 2(1) 2(1) 2(1)'

loop_
 _symmetry_equiv_pos_as_xyz
 'x, y, z'
 '-x+1/2, -y, z+1/2'
 '-x, y+1/2, -z+1/2'
 'x+1/2, -y+1/2, -z'

_cell_length_a                    5.684(2)
_cell_length_b                    6.682(2)
_cell_length_c                    36.02(2)
_cell_angle_alpha                 90.00
_cell_angle_beta                  90.00
_cell_angle_gamma                 90.00
_cell_volume                      1368.1(10)
_cell_formula_units_Z             4
_cell_measurement_temperature     100(2)
_cell_measurement_reflns_used     12755
_cell_measurement_theta_min       3
_cell_measurement_theta_max       36

_exptl_crystal_description        'plate'
_exptl_crystal_colour             'colourless'
_exptl_crystal_size_max           0.42
_exptl_crystal_size_mid           0.25
_exptl_crystal_size_min           0.15
_exptl_crystal_density_meas       ?
_exptl_crystal_density_diffrn     1.429
_exptl_crystal_density_method     'not measured'
_exptl_crystal_F_000              624
_exptl_absorpt_coefficient_mu     0.109
_exptl_absorpt_correction_type    none
_exptl_absorpt_correction_T_min   ?
_exptl_absorpt_correction_T_max   ?
_exptl_absorpt_process_details    ?

_exptl_special_details
;
 ?
;

_diffrn_ambient_temperature       100(2)
_diffrn_radiation_wavelength      0.71073
_diffrn_radiation_type            MoK\a
_diffrn_radiation_source          'medium-focus sealed tube'
_diffrn_radiation_monochromator   graphite
_diffrn_measurement_device_type   'Kuma KM-4-CCD \k-geometry'
_diffrn_measurement_method        '\w'
_diffrn_detector_area_resol_mean  ?
_diffrn_standards_number          ?
_diffrn_standards_interval_count  ?
_diffrn_standards_interval_time   ?
_diffrn_standards_decay_%         ?
_diffrn_reflns_number             21712
_diffrn_reflns_av_R_equivalents   0.0323
_diffrn_reflns_av_sigmaI/netI     0.0247
_diffrn_reflns_limit_h_min        -9
_diffrn_reflns_limit_h_max        9
_diffrn_reflns_limit_k_min        -10
_diffrn_reflns_limit_k_max        10
_diffrn_reflns_limit_l_min        -59
_diffrn_reflns_limit_l_max        60
_diffrn_reflns_theta_min          3.10
_diffrn_reflns_theta_max          36.84
_reflns_number_total              3716
_reflns_number_gt                 3336
_reflns_threshold_expression      >2sigma(I)

_computing_data_collection        'CrysAlis CCD (Oxford Diffraction, 2003)'
_computing_cell_refinement        'CrysAlis RED (Oxford Diffraction, 2003)'
_computing_data_reduction         'CrysAlis RED'
_computing_structure_solution     'SHELXS-97 (Sheldrick, 2008)'
_computing_structure_refinement   'SHELXL-97 (Sheldrick, 2008)'
_computing_molecular_graphics     ?
_computing_publication_material   ?

_refine_special_details
;
 Refinement of F^2^ against ALL reflections.  The weighted R-factor wR and
 goodness of fit S are based on F^2^, conventional R-factors R are based
 on F, with F set to zero for negative F^2^. The threshold expression of
 F^2^ > 2sigma(F^2^) is used only for calculating R-factors(gt) etc. and is
 not relevant to the choice of reflections for refinement.  R-factors based
 on F^2^ are statistically about twice as large as those based on F, and R-
 factors based on ALL data will be even larger.
;

_refine_ls_structure_factor_coef  Fsqd
_refine_ls_matrix_type            full
_refine_ls_weighting_scheme       calc
_refine_ls_weighting_details
 'calc w=1/[\s^2^(Fo^2^)+(0.055P)^2^+0.51P] where P=(Fo^2^+2Fc^2^)/3'
_atom_sites_solution_primary      direct
_atom_sites_solution_secondary    difmap
_atom_sites_solution_hydrogens    geom
_refine_ls_hydrogen_treatment     constr
_refine_ls_extinction_method      none
_refine_ls_extinction_coef        ?
_refine_ls_abs_structure_details  ?
_refine_ls_number_reflns          3716
_refine_ls_number_parameters      192
_refine_ls_number_restraints      0
_refine_ls_R_factor_all           0.0589
_refine_ls_R_factor_gt            0.0521
_refine_ls_wR_factor_ref          0.1176
_refine_ls_wR_factor_gt           0.1150
_refine_ls_goodness_of_fit_ref    1.096
_refine_ls_restrained_S_all       1.096
_refine_ls_shift/su_max           0.000
_refine_ls_shift/su_mean          0.000

loop_
 _atom_site_label
 _atom_site_type_symbol
 _atom_site_fract_x
 _atom_site_fract_y
 _atom_site_fract_z
 _atom_site_U_iso_or_equiv
 _atom_site_adp_type
 _atom_site_occupancy
 _atom_site_symmetry_multiplicity
 _atom_site_calc_flag
 _atom_site_refinement_flags
 _atom_site_disorder_assembly
 _atom_site_disorder_group
C1' C 1.3084(3) 1.0062(2) 0.41305(4) 0.0125(2) Uani 1 1 d . . .
H1' H 1.3902 1.1364 0.4086 0.015 Uiso 1 1 calc R . .
C2' C 1.2428(3) 0.9876(3) 0.45409(4) 0.0149(3) Uani 1 1 d . . .
H2'A H 1.2093 1.1201 0.4652 0.018 Uiso 1 1 calc R . .
H2'B H 1.1048 0.8992 0.4576 0.018 Uiso 1 1 calc R . .
C3' C 1.4654(3) 0.8950(3) 0.47061(4) 0.0150(3) Uani 1 1 d . . .
H3'A H 1.4288 0.8153 0.4934 0.018 Uiso 1 1 calc R . .
C4' C 1.5542(3) 0.7605(3) 0.43913(4) 0.0146(3) Uani 1 1 d . . .
H4' H 1.7297 0.7701 0.4383 0.017 Uiso 1 1 calc R . .
C5' C 1.4878(3) 0.5414(3) 0.44143(5) 0.0177(3) Uani 1 1 d . . .
H5'A H 1.5275 0.4745 0.4177 0.021 Uiso 1 1 calc R . .
H5'B H 1.5797 0.4764 0.4614 0.021 Uiso 1 1 calc R . .
O3' O 1.6343(3) 1.0473(2) 0.47819(3) 0.0228(3) Uani 1 1 d . . .
H3' H 1.6708 1.0441 0.5008 0.034 Uiso 1 1 calc R . .
O4' O 1.4620(2) 0.84620(19) 0.40529(3) 0.0151(2) Uani 1 1 d . . .
O5' O 1.2414(2) 0.5179(2) 0.44880(3) 0.0197(2) Uani 1 1 d . . .
H5' H 1.1796 0.4494 0.4319 0.030 Uiso 1 1 calc R . .
N3 N 1.1036(2) 0.9869(2) 0.38770(3) 0.0120(2) Uani 1 1 d . . .
C2 C 0.9807(3) 1.1619(2) 0.37830(4) 0.0141(3) Uani 1 1 d . . .
C7a C 0.7401(3) 0.9690(2) 0.34315(4) 0.0127(2) Uani 1 1 d . . .
C4a C 0.8501(3) 0.7867(2) 0.35254(4) 0.0122(2) Uani 1 1 d . . .
C4 C 1.0399(3) 0.8014(2) 0.37549(4) 0.0124(2) Uani 1 1 d . . .
H4 H 1.1254 0.6857 0.3828 0.015 Uiso 1 1 calc R . .
O2 O 1.0439(3) 1.32461(19) 0.39182(3) 0.0196(2) Uani 1 1 d . . .
N1 N 0.7942(3) 1.1493(2) 0.35418(4) 0.0155(2) Uani 1 1 d . . .
C5 C 0.7172(3) 0.6309(2) 0.33448(4) 0.0141(3) Uani 1 1 d . . .
H5 H 0.7454 0.4909 0.3356 0.017 Uiso 1 1 calc R . .
C6 C 0.5444(3) 0.7249(2) 0.31560(4) 0.0135(2) Uani 1 1 d . . .
C8 C 0.3521(3) 0.6496(3) 0.29145(4) 0.0156(3) Uani 1 1 d . . .
H8A H 0.3926 0.6749 0.2651 0.019 Uiso 1 1 calc R . .
H8B H 0.2052 0.7231 0.2971 0.019 Uiso 1 1 calc R . .
C9 C 0.3116(4) 0.4247(3) 0.29718(5) 0.0213(3) Uani 1 1 d . . .
H9A H 0.4612 0.3526 0.2928 0.026 Uiso 1 1 calc R . .
H9B H 0.2639 0.4009 0.3232 0.026 Uiso 1 1 calc R . .
C10 C 0.1237(4) 0.3405(3) 0.27139(5) 0.0242(3) Uani 1 1 d . . .
H10A H 0.1049 0.1969 0.2761 0.036 Uiso 1 1 calc R . .
H10B H 0.1712 0.3615 0.2455 0.036 Uiso 1 1 calc R . .
H10C H -0.0260 0.4090 0.2760 0.036 Uiso 1 1 calc R . .
O7 O 0.5556(2) 0.93551(17) 0.32020(3) 0.0150(2) Uani 1 1 d . . .

loop_
 _atom_site_aniso_label
 _atom_site_aniso_U_11
 _atom_site_aniso_U_22
 _atom_site_aniso_U_33
 _atom_site_aniso_U_23
 _atom_site_aniso_U_13
 _atom_site_aniso_U_12
C1' 0.0134(5) 0.0107(6) 0.0134(5) 0.0013(5) -0.0013(5) -0.0004(5)
C2' 0.0166(6) 0.0146(7) 0.0135(5) -0.0010(5) -0.0011(5) 0.0008(5)
C3' 0.0166(6) 0.0150(7) 0.0133(5) 0.0007(5) -0.0027(5) -0.0034(6)
C4' 0.0131(5) 0.0157(7) 0.0149(5) 0.0014(5) -0.0020(5) 0.0001(5)
C5' 0.0198(7) 0.0146(7) 0.0187(6) 0.0010(5) -0.0001(6) 0.0007(6)
O3' 0.0266(6) 0.0235(7) 0.0184(5) 0.0008(5) -0.0079(5) -0.0105(6)
O4' 0.0148(4) 0.0188(5) 0.0117(4) 0.0019(4) 0.0001(4) 0.0024(5)
O5' 0.0230(5) 0.0186(6) 0.0174(5) -0.0030(4) 0.0025(4) -0.0065(5)
N3 0.0147(5) 0.0088(5) 0.0124(4) 0.0007(4) -0.0018(4) 0.0002(4)
C2 0.0171(6) 0.0101(6) 0.0151(5) 0.0020(5) -0.0015(5) -0.0003(5)
C7a 0.0148(6) 0.0118(6) 0.0114(5) 0.0016(5) -0.0013(5) -0.0002(5)
C4a 0.0146(6) 0.0100(6) 0.0121(5) -0.0008(4) -0.0008(5) 0.0011(5)
C4 0.0150(5) 0.0093(6) 0.0131(5) -0.0005(4) -0.0018(5) 0.0005(5)
O2 0.0255(6) 0.0098(5) 0.0234(5) -0.0005(4) -0.0078(5) -0.0005(5)
N1 0.0180(6) 0.0108(6) 0.0176(5) 0.0010(5) -0.0053(5) 0.0002(5)
C5 0.0177(6) 0.0106(6) 0.0141(5) -0.0019(5) -0.0013(5) 0.0015(5)
C6 0.0159(6) 0.0109(6) 0.0138(5) -0.0012(5) -0.0010(5) -0.0005(5)
C8 0.0160(6) 0.0164(7) 0.0144(5) 0.0003(5) -0.0032(5) 0.0002(6)
C9 0.0270(8) 0.0161(7) 0.0209(6) -0.0017(6) -0.0060(7) -0.0036(6)
C10 0.0245(8) 0.0239(9) 0.0242(7) -0.0059(7) -0.0041(7) -0.0049(8)
O7 0.0179(5) 0.0098(5) 0.0173(4) 0.0009(4) -0.0054(4) 0.0003(4)

_geom_special_details
;
 All esds (except the esd in the dihedral angle between two l.s. planes)
 are estimated using the full covariance matrix.  The cell esds are taken
 into account individually in the estimation of esds in distances, angles
 and torsion angles; correlations between esds in cell parameters are only
 used when they are defined by crystal symmetry.  An approximate (isotropic)
 treatment of cell esds is used for estimating esds involving l.s. planes.
;

loop_
 _geom_bond_atom_site_label_1
 _geom_bond_atom_site_label_2
 _geom_bond_distance
 _geom_bond_site_symmetry_2
 _geom_bond_publ_flag
C1' O4' 1.408(2) . ?
C1' N3 1.4850(19) . ?
C1' C2' 1.529(2) . ?
C1' H1' 1.0000 . ?
C2' C3' 1.529(2) . ?
C2' H2'A 0.9900 . ?
C2' H2'B 0.9900 . ?
C3' O3' 1.426(2) . ?
C3' C4' 1.533(2) . ?
C3' H3'A 1.0000 . ?
C4' O4' 1.4450(19) . ?
C4' C5' 1.514(3) . ?
C4' H4' 1.0000 . ?
C5' O5' 1.434(2) . ?
C5' H5'A 0.9900 . ?
C5' H5'B 0.9900 . ?
O3' H3' 0.8400 . ?
O5' H5' 0.8400 . ?
N3 C4 1.365(2) . ?
N3 C2 1.403(2) . ?
C2 O2 1.244(2) . ?
C2 N1 1.373(2) . ?
C7a N1 1.306(2) . ?
C7a O7 1.3539(19) . ?
C7a C4a 1.410(2) . ?
C4a C4 1.362(2) . ?
C4a C5 1.441(2) . ?
C4 H4 0.9500 . ?
C5 C6 1.349(2) . ?
C5 H5 0.9500 . ?
C6 O7 1.419(2) . ?
C6 C8 1.485(2) . ?
C8 C9 1.534(3) . ?
C8 H8A 0.9900 . ?
C8 H8B 0.9900 . ?
C9 C10 1.523(3) . ?
C9 H9A 0.9900 . ?
C9 H9B 0.9900 . ?
C10 H10A 0.9800 . ?
C10 H10B 0.9800 . ?
C10 H10C 0.9800 . ?

loop_
 _geom_angle_atom_site_label_1
 _geom_angle_atom_site_label_2
 _geom_angle_atom_site_label_3
 _geom_angle
 _geom_angle_site_symmetry_1
 _geom_angle_site_symmetry_3
 _geom_angle_publ_flag
O4' C1' N3 107.35(12) . . ?
O4' C1' C2' 106.34(12) . . ?
N3 C1' C2' 113.34(13) . . ?
O4' C1' H1' 109.9 . . ?
N3 C1' H1' 109.9 . . ?
C2' C1' H1' 109.9 . . ?
C3' C2' C1' 101.97(12) . . ?
C3' C2' H2'A 111.4 . . ?
C1' C2' H2'A 111.4 . . ?
C3' C2' H2'B 111.4 . . ?
C1' C2' H2'B 111.4 . . ?
H2'A C2' H2'B 109.2 . . ?
O3' C3' C2' 110.05(14) . . ?
O3' C3' C4' 109.79(14) . . ?
C2' C3' C4' 102.82(12) . . ?
O3' C3' H3'A 111.3 . . ?
C2' C3' H3'A 111.3 . . ?
C4' C3' H3'A 111.3 . . ?
O4' C4' C5' 109.83(13) . . ?
O4' C4' C3' 105.79(13) . . ?
C5' C4' C3' 116.40(13) . . ?
O4' C4' H4' 108.2 . . ?
C5' C4' H4' 108.2 . . ?
C3' C4' H4' 108.2 . . ?
O5' C5' C4' 111.04(14) . . ?
O5' C5' H5'A 109.4 . . ?
C4' C5' H5'A 109.4 . . ?
O5' C5' H5'B 109.4 . . ?
C4' C5' H5'B 109.4 . . ?
H5'A C5' H5'B 108.0 . . ?
C3' O3' H3' 109.5 . . ?
C1' O4' C4' 111.00(11) . . ?
C5' O5' H5' 109.5 . . ?
C4 N3 C2 123.16(13) . . ?
C4 N3 C1' 119.01(13) . . ?
C2 N3 C1' 117.80(13) . . ?
O2 C2 N1 121.58(15) . . ?
O2 C2 N3 119.34(14) . . ?
N1 C2 N3 119.08(14) . . ?
N1 C7a O7 121.36(14) . . ?
N1 C7a C4a 128.30(14) . . ?
O7 C7a C4a 110.33(13) . . ?
C4 C4a C7a 115.75(14) . . ?
C4 C4a C5 137.79(15) . . ?
C7a C4a C5 106.44(13) . . ?
C4a C4 N3 118.11(14) . . ?
C4a C4 H4 120.9 . . ?
N3 C4 H4 120.9 . . ?
C7a N1 C2 115.50(14) . . ?
C6 C5 C4a 105.84(14) . . ?
C6 C5 H5 127.1 . . ?
C4A C5 H5 127.1 . . ?
C5 C6 O7 111.72(14) . . ?
C5 C6 C8 132.32(15) . . ?
O7 C6 C8 115.95(14) . . ?
C6 C8 C9 111.32(14) . . ?
C6 C8 H8A 109.4 . . ?
C9 C8 H8A 109.4 . . ?
C6 C8 H8B 109.4 . . ?
C9 C8 H8B 109.4 . . ?
H8A C8 H8B 108.0 . . ?
C10 C9 C8 112.65(16) . . ?
C10 C9 H9A 109.1 . . ?
C8 C9 H9A 109.1 . . ?
C10 C9 H9B 109.1 . . ?
C8 C9 H9B 109.1 . . ?
H9A C9 H9B 107.8 . . ?
C9 C10 H10A 109.5 . . ?
C9 C10 H10B 109.5 . . ?
H10A C10 H10B 109.5 . . ?
C9 C10 H10C 109.5 . . ?
H10A C10 H10C 109.5 . . ?
H10B C10 H10C 109.5 . . ?
C7a O7 C6 105.65(12) . . ?

loop_
 _geom_torsion_atom_site_label_1
 _geom_torsion_atom_site_label_2
 _geom_torsion_atom_site_label_3
 _geom_torsion_atom_site_label_4
 _geom_torsion
 _geom_torsion_site_symmetry_1
 _geom_torsion_site_symmetry_2
 _geom_torsion_site_symmetry_3
 _geom_torsion_site_symmetry_4
 _geom_torsion_publ_flag
O4' C1' C2' C3' 31.39(16) . . . . ?
N3 C1' C2' C3' 149.10(13) . . . . ?
C1' C2' C3' O3' 83.24(15) . . . . ?
C1' C2' C3' C4' -33.67(15) . . . . ?
O3' C3' C4' O4' -91.94(15) . . . . ?
C2' C3' C4' O4' 25.16(16) . . . . ?
O3' C3' C4' C5' 145.80(14) . . . . ?
C2' C3' C4' C5' -97.10(16) . . . . ?
O4' C4' C5' O5' -71.65(16) . . . . ?
C3' C4' C5' O5' 48.48(18) . . . . ?
N3 C1' O4' C4' -137.95(13) . . . . ?
C2' C1' O4' C4' -16.34(16) . . . . ?
C5' C4' O4' C1' 120.61(14) . . . . ?
C3' C4' O4' C1' -5.76(17) . . . . ?
O4' C1' N3 C4 28.48(17) . . . . ?
C2' C1' N3 C4 -88.64(17) . . . . ?
O4' C1' N3 C2 -153.26(13) . . . . ?
C2' C1' N3 C2 89.62(16) . . . . ?
C4 N3 C2 O2 176.95(15) . . . . ?
C1' N3 C2 O2 -1.2(2) . . . . ?
C4 N3 C2 N1 -3.4(2) . . . . ?
C1' N3 C2 N1 178.40(13) . . . . ?
N1 C7a C4a C4 -1.4(2) . . . . ?
O7 C7a C4a C4 179.70(13) . . . . ?
N1 C7a C4a C5 177.40(16) . . . . ?
O7 C7a C4a C5 -1.49(16) . . . . ?
C7a C4a C4 N3 1.1(2) . . . . ?
C5 C4a C4 N3 -177.22(17) . . . . ?
C2 N3 C4 C4a 1.2(2) . . . . ?
C1' N3 C4 C4a 179.37(13) . . . . ?
O7 C7a N1 C2 178.08(14) . . . . ?
C4a C7a N1 C2 -0.7(2) . . . . ?
O2 C2 N1 C7a -177.39(15) . . . . ?
N3 C2 N1 C7a 3.0(2) . . . . ?
C4 C4a C5 C6 179.30(18) . . . . ?
C7a C4a C5 C6 0.88(16) . . . . ?
C4a C5 C6 O7 -0.02(18) . . . . ?
C4a C5 C6 C8 179.48(16) . . . . ?
C5 C6 C8 C9 16.9(2) . . . . ?
O7 C6 C8 C9 -163.63(14) . . . . ?
C6 C8 C9 C10 -177.11(15) . . . . ?
N1 C7a O7 C6 -177.53(14) . . . . ?
C4a C7a O7 C6 1.45(16) . . . . ?
C5 C6 O7 C7a -0.88(18) . . . . ?
C8 C6 O7 C7a 179.53(13) . . . . ?

loop_
 _geom_hbond_atom_site_label_D
 _geom_hbond_atom_site_label_H
 _geom_hbond_atom_site_label_A
 _geom_hbond_distance_DH
 _geom_hbond_distance_HA
 _geom_hbond_distance_DA
 _geom_hbond_angle_DHA
 _geom_hbond_site_symmetry_A
O3' H3' O5' 0.84 1.91 2.734(2) 169   4_566
O5' H5' O2  0.84 1.84 2.673(2) 174   1_545
C4  H4  O2  0.95 2.48 3.240(2) 137   1_545
C5  H5  N1  0.95 2.39 3.324(2) 166   1_545

_diffrn_measured_fraction_theta_max    0.936
_diffrn_reflns_theta_full              27.50
_diffrn_measured_fraction_theta_full   0.999
_refine_diff_density_max    0.58
_refine_diff_density_min   -0.28
_refine_diff_density_rms    0.071

#===END
